# Supplementary material
Source: PubMed Central journal article supplement (PMC3430853)

Supplemental figure 1

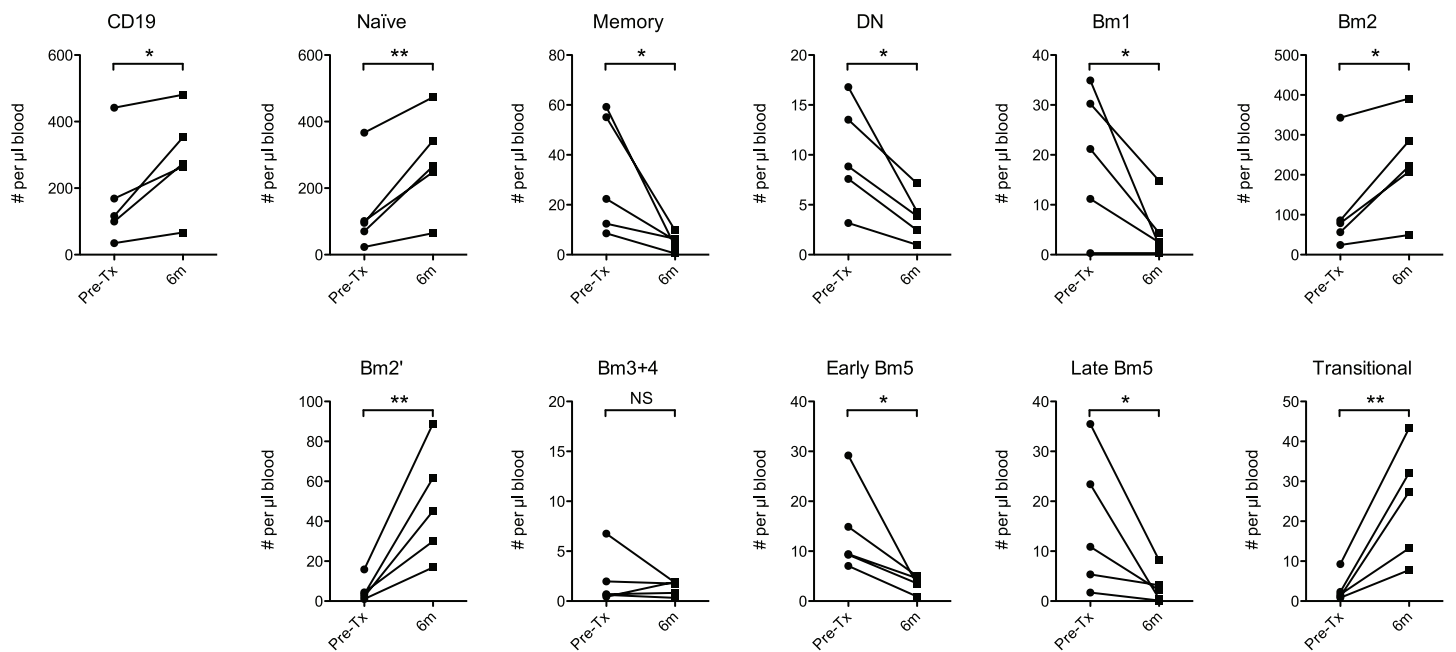

Supplement: ajt0012-1784-SD2.pdf [file ajt0012-1784-SD2.pdf]
